# Supplementary material for: Partially nitrided molybdenum trioxide with promoted performance as an anode material for lithium-ion batteries
Source: Royal Society of Chemistry journal article supplement (doi:10.1039/c3ta13708b), 2013-11-01
Supplement: c3ta13708b.pdf [file c3ta13708b.pdf]

## Electronic Supplementary Information (ESI)

### Partially Nitrided Molybdenum Trioxide with Promoted Performance as the Anode Material for Lithium-Ion Batteries

Wenxu Ji, Rui Shen, Rong Yang, Guiyun Yu, Xuefeng Guo, Luming Peng\* and Weiping Ding\*

Key Lab of Mesoscopic Chemistry, School of Chemistry and Chemical Engineering, Nanjing University, Nanjing 210093, China

Corresponding authors: luming@nju.edu.cn, dingwp@nju.edu.cn

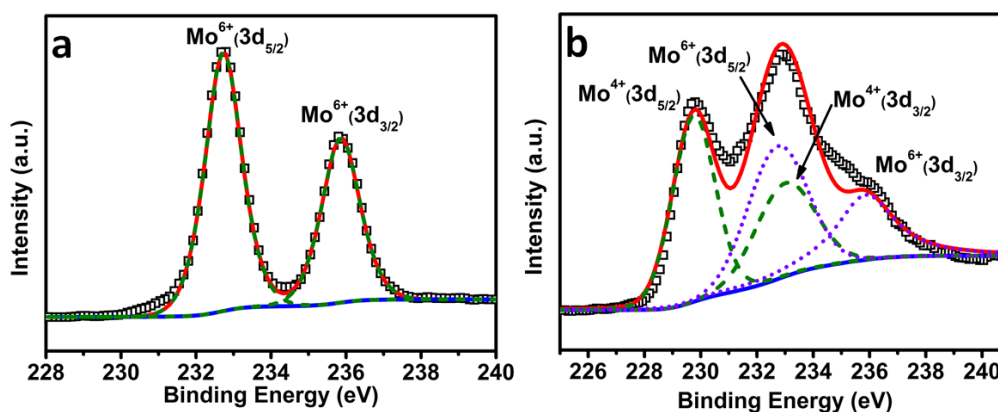

**Fig. S1.** XPS patterns of MoO<sub>3</sub> in the Mo 3d region: a) before argon ion etching; b) after argon ion etching.

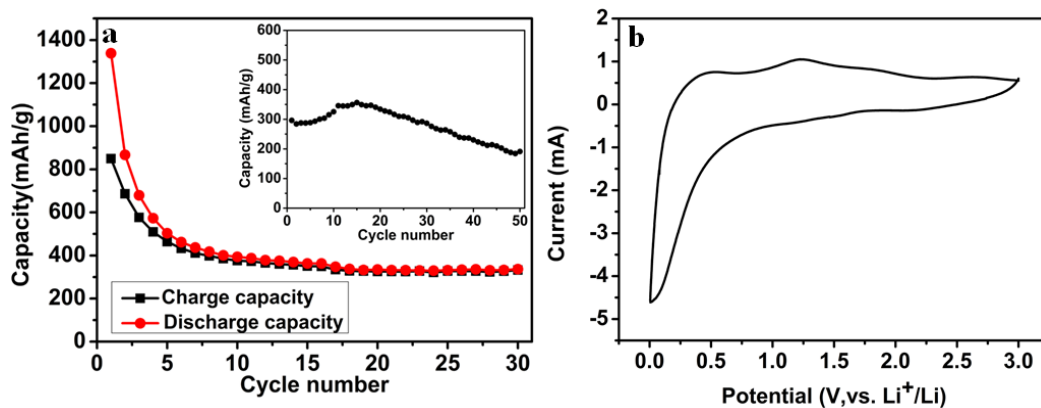

**Fig. S2.** Electrochemical performance of the bulk MoO<sub>3</sub> and the MoO<sub>2</sub> obtained by heating MoO<sub>3</sub> in NH<sub>3</sub> atmosphere at 450 °C: a) Cycling behavior of the bulk MoO<sub>3</sub> in the range of 0.005-3 V vs. Li<sup>+</sup>/Li at a current density of 50 mA/g. The inset shows the cycling behavior of MoO<sub>2</sub>; b) Cycling voltammograms of the bulk MoO<sub>3</sub> at a scan rate of 0.2 mV/s in the range of 0.005-3 V vs. Li<sup>+</sup>/Li.

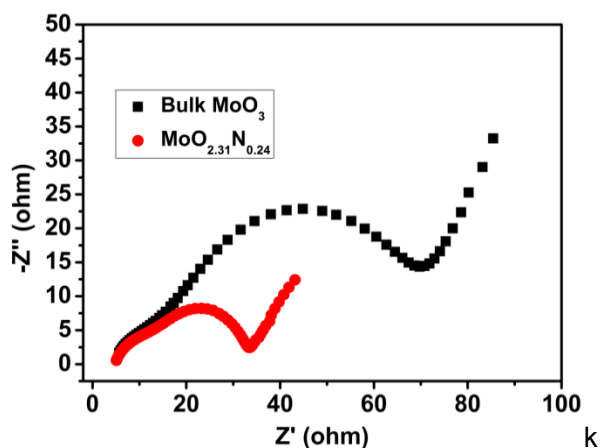

**Fig. S3.** Electrochemical impedance spectra of the as-synthesized MoO<sub>2.31</sub>N<sub>0.24</sub> and bulk MoO<sub>3</sub>.

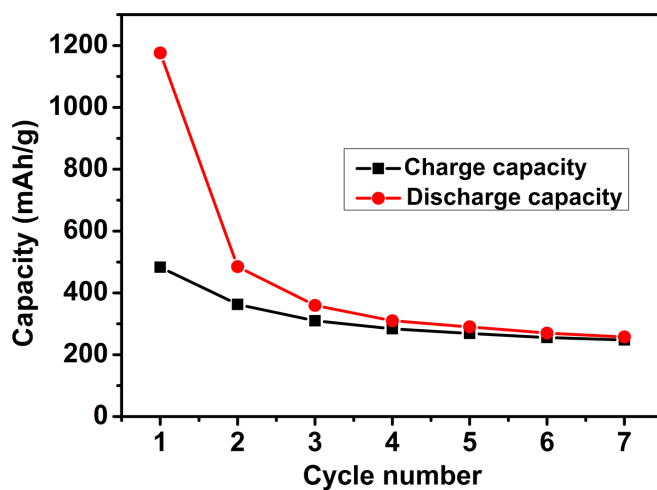

**Fig. S4.** Cycling behavior of the mixture of MoO<sub>3</sub> (95 wt%) and MoO<sub>2</sub> (obtained by heating MoO<sub>3</sub> in NH<sub>3</sub> atmosphere at 450 °C, 5 wt%) in the range of 0.005-3 V vs. Li<sup>+</sup>/Li at a current density of 100 mA/g.

**Table S1.** Results of peak fitting for the molybdenum oxynitride in the Mo 3d region before argon ion etching.

| Peak                                  | Position(eV) | Relative peak Area (%) | FWHM(eV) |
|---------------------------------------|--------------|------------------------|----------|
| Mo <sup>4+</sup> (3d <sub>5/2</sub> ) | 229.8        | 24.2                   | 1.45     |
| Mo <sup>4+</sup> (3d <sub>3/2</sub> ) | 233.0        | 16.1                   | 1.45     |
| Mo <sup>6+</sup> (3d <sub>5/2</sub> ) | 232.8        | 35.8                   | 1.50     |
| Mo <sup>6+</sup> (3d <sub>3/2</sub> ) | 235.9        | 23.9                   | 1.50     |

**Table S2.** Results of peak fitting for MoO<sub>3</sub> in the Mo 3d region after argon ion etching.

| Peak                                  | Position(eV) | Relative peak Area (%) | FWHM(eV) |
|---------------------------------------|--------------|------------------------|----------|
| Mo <sup>4+</sup> (3d <sub>5/2</sub> ) | 229.8        | 30.8                   | 1.80     |
| Mo <sup>4+</sup> (3d <sub>3/2</sub> ) | 233.0        | 20.5                   | 2.50     |
| Mo <sup>6+</sup> (3d <sub>5/2</sub> ) | 232.8        | 29.2                   | 2.50     |
| Mo <sup>6+</sup> (3d <sub>3/2</sub> ) | 235.9        | 19.5                   | 2.42     |

**Table S3.** Results of peak fitting for the molybdenum oxynitride in the Mo 3d region after argon ion etching.

| Peak                                  | Position(eV) | Relative peak Area (%) | FWHM(eV) |
|---------------------------------------|--------------|------------------------|----------|
| Mo <sup>4+</sup> (3d <sub>5/2</sub> ) | 229.8        | 40.3                   | 1.58     |
| Mo <sup>4+</sup> (3d <sub>3/2</sub> ) | 233.0        | 26.9                   | 2.30     |
| Mo <sup>6+</sup> (3d <sub>5/2</sub> ) | 232.8        | 19.7                   | 2.54     |
| Mo <sup>6+</sup> (3d <sub>3/2</sub> ) | 235.9        | 13.1                   | 2.60     |

**Table S4.** Electronic conductivities of the materials.

| Sample                                | Electronic conductivity (S/cm) |
|---------------------------------------|--------------------------------|
| MoO <sub>3</sub>                      | (1.6~1.1)*10 <sup>-5</sup>     |
| MoO <sub>2.31</sub> N <sub>0.24</sub> | 5*10 <sup>-2</sup>             |
| MoO <sub>2</sub> <sup>[a]</sup>       | 25                             |
| Mo <sub>2</sub> N                     | > 10 <sup>4</sup>              |

<sup>[a]</sup> MoO<sub>2</sub> was obtained by heating MoO<sub>3</sub> in NH<sub>3</sub> atmosphere at 450 °C.
